# Supplementary material for: Assessing Quality of Life in First- and Second-Generation Immigrant Children and Adolescents; Highlights from the DIATROFI Food Aid and Healthy Nutrition Promotion Program
Source: MDPI journal article supplement (doi:10.3390/ijerph20032471), 2023-01-30
Supplement: s1 [file s1]

**Supplementary Table S1.** Pediatric Quality of Life Inventory questionnaire (PedsQL). Each question of the PedsQL scores from 0: Almost always had problem with... to 100: Never had problem with...

| Physical Functioning Score                                         | PF   | Emotional Functioning Score                       | EF   |
|--------------------------------------------------------------------|------|---------------------------------------------------|------|
| 1. Walking more than one block                                     | PF1  | 1. Feeling afraid or scared                       | EF1  |
| 2. Running                                                         | PF2  | 2. Feeling sad or blue                            | EF2  |
| 3. Participating in sports activity or exercise                    | PF3  | 3. Feeling angry                                  | EF3  |
| 4. Lifting something heavy                                         | PF4  | 4. Trouble sleeping                               | EF4  |
| 5. Taking a bath or shower by him or herself                       | PF5  | 5. Worrying about what will happen to him or her  | EF5  |
| 6. Doing chores around the house                                   | PF6  |                                                   |      |
| 7. Having hurts or aches                                           | PF7  |                                                   |      |
| 8. Low energy level                                                | PF8  |                                                   |      |
| Social Functioning Score                                           | SoF  | School Functioning Score                          | ScF  |
| 1. Getting along with other children                               | SoF1 | 1. Paying attention in class                      | ScF1 |
| 2. Other kids not wanting to be his or her friend                  | SoF2 | 2. Forgetting things                              | ScF2 |
| 3. Getting teased by other children                                | SoF3 | 3. Keeping up with schoolwork                     | ScF3 |
| 4. Not able to do things that other children his or her age can do | SoF4 | 4. Missing school because of not feeling well     | ScF4 |
| 5. Keeping up when playing with other children                     | SoF5 | 5. Missing school to go to the doctor or hospital | ScF5 |

**Supplementary Table S2.** Pearson's correlation and Cronbach's diagonal results for health related-quality of life (HRQoL) and its subscales with each question.

| <i>Pearson correlations*</i> | PF           | PF1          | PF2          | PF3          | PF4          | PF5    | PF6    | PF7    | PF8    |
|------------------------------|--------------|--------------|--------------|--------------|--------------|--------|--------|--------|--------|
| PF                           | 1            |              |              |              |              |        |        |        |        |
| PF1                          | 0.7437       | 1            |              |              |              |        |        |        |        |
| PF2                          | 0.7917       | 0.7649       | 1            |              |              |        |        |        |        |
| PF3                          | 0.8029       | 0.6474       | 0.7294       | 1            |              |        |        |        |        |
| PF4                          | 0.7532       | 0.5068       | 0.584        | 0.6213       | 1            |        |        |        |        |
| PF5                          | 0.6993       | 0.3968       | 0.397        | 0.4565       | 0.3693       | 1      |        |        |        |
| PF6                          | 0.7349       | 0.3833       | 0.3969       | 0.4483       | 0.4499       | 0.635  | 1      |        |        |
| PF7                          | 0.5526       | 0.3172       | 0.3294       | 0.3236       | 0.3672       | 0.2056 | 0.3048 | 1      |        |
| PF8                          | 0.6162       | 0.3505       | 0.4071       | 0.4225       | 0.4551       | 0.2516 | 0.3164 | 0.5057 | 1      |
| HRQoL score                  | 0.8346       | 0.5578       | 0.6268       | 0.6431       | 0.608        | 0.5782 | 0.624  | 0.5321 | 0.5812 |
| <i>Pearson correlations*</i> | EF           | EF1          | EF2          | EF3          | EF4          | EF5    | -      | -      | -      |
| EF                           | 1            |              |              |              |              |        |        |        |        |
| EF1                          | 0.8107       | 1            |              |              |              |        |        |        |        |
| EF2                          | 0.8402       | 0.6527       | 1            |              |              |        |        |        |        |
| EF3                          | 0.8253       | 0.5789       | 0.6772       | 1            |              |        |        |        |        |
| EF4                          | 0.684        | 0.4184       | 0.4207       | 0.4249       | 1            |        |        |        |        |
| EF5                          | 0.7202       | 0.5123       | 0.5028       | 0.4204       | 0.4331       | 1      |        |        |        |
| HRQoL score                  | 0.7327       | 0.5606       | 0.6072       | 0.5937       | 0.5567       | 0.5273 |        |        |        |
| <i>Pearson correlations*</i> | SoF          | SoF1         | SoF2         | SoF3         | SoF4         | SoF5   | -      | -      | -      |
| SoF                          | 1            |              |              |              |              |        |        |        |        |
| SoF1                         | 0.7943       | 1            |              |              |              |        |        |        |        |
| SoF2                         | 0.8302       | 0.6024       | 1            |              |              |        |        |        |        |
| SoF3                         | 0.7557       | 0.4895       | 0.6784       | 1            |              |        |        |        |        |
| SoF4                         | 0.8477       | 0.5235       | 0.5968       | 0.4985       | 1            |        |        |        |        |
| SoF5                         | 0.8618       | 0.6327       | 0.5682       | 0.4748       | 0.7812       | 1      |        |        |        |
| HRQoL score                  | 0.8537       | 0.6977       | 0.6679       | 0.6229       | 0.7389       | 0.7574 |        |        |        |
| <i>Pearson correlations*</i> | ScF          | ScF1         | ScF2         | ScF3         | ScF4         | ScF5   | -      | -      | -      |
| ScF                          | 1            |              |              |              |              |        |        |        |        |
| ScF1                         | 0.8505       | 1            |              |              |              |        |        |        |        |
| ScF2                         | 0.8127       | 0.6328       | 1            |              |              |        |        |        |        |
| ScF3                         | 0.8644       | 0.8107       | 0.6667       | 1            |              |        |        |        |        |
| ScF4                         | 0.6587       | 0.3495       | 0.381        | 0.366        | 1            |        |        |        |        |
| ScF5                         | 0.5586       | 0.2516       | 0.2835       | 0.2503       | 0.5991       | 1      |        |        |        |
| HRQoL score                  | 0.8238       | 0.7209       | 0.6725       | 0.7249       | 0.5055       | 0.4571 |        |        |        |
|                              | HRQoL score  | PF           | EF           | SoF          | ScF          |        |        |        |        |
| <b>Cronbach's a</b>          | <b>0.926</b> | <b>0.863</b> | <b>0.836</b> | <b>0.876</b> | <b>0.809</b> |        |        |        |        |

\*p<0.001 in all correlations

**Supplementary Table S3.** Nationality of first-generation immigrant students participated in the DIATROFI Program (N=110).

|                                                              | %    |
|--------------------------------------------------------------|------|
| <b>Nationality of first-generation immigrant students, %</b> |      |
| Balkans                                                      | 69.7 |
| Other European countries and Russia                          | 11.9 |
| Asian countries                                              | 12.8 |
| North & South American and African countries                 | 5.5  |

*Balkans (Albania, Romania, Bulgaria), other European countries, and Russia (Russia, Germany, Ukraine, Switzerland, Cyprus, Italy), Asian countries (Georgia, Syria, Afghanistan, India, Bangladesh, Iran) and North & South American and African countries (Egypt, USA, Canada, Ethiopia).*

**Supplementary Table S4.** Sociodemographic characteristics of students and their family participated in the DIATROFI Program in the total sample and according to students' HRQoL.

|                                              | Total Sample | Students' HRQoL |       |                |
|----------------------------------------------|--------------|-----------------|-------|----------------|
| Characteristics of students and their family |              | Poor            | Good  | <i>p-value</i> |
| N                                            | 2,151        | 538             | 1,613 |                |
| Students' characteristics                    |              |                 |       |                |
| Students' age, years                         | 8 (3)        | 9 (4)           | 8 (3) | <0.001         |
| Boys, %                                      | 51.8         | 55.4            | 50.2  | 0.058          |
| Student's highest educational attainment, %  |              |                 |       |                |
| Pre-primary school (kindergarten)            | 26.5         | 26.1            | 27.0  | <0.001         |
| Primary school                               | 65.9         | 58.9            | 67.9  |                |
| Secondary school                             | 7.6          | 15.0            | 5.1   |                |
| Family characteristics                       |              |                 |       |                |
| Parental employment status, %                |              |                 |       |                |
| Both parents are employed                    | 46.0         | 41.6            | 47.5  | 0.001          |
| One parent is unemployed                     | 46.1         | 46.3            | 45.5  |                |
| Both parents are unemployed                  | 7.9          | 12.1            | 7.0   |                |
| Paternal educational level, %                |              |                 |       |                |
| Low                                          | 33.0         | 39.1            | 30.7  | 0.003          |
| Moderate                                     | 41.3         | 38.0            | 42.0  |                |
| High                                         | 25.7         | 22.9            | 27.3  |                |
| Maternal educational level, %                |              |                 |       |                |
| Low                                          | 25.8         | 34.0            | 23.9  | <0.001         |
| Moderate                                     | 32.7         | 31.2            | 33.1  |                |
| High                                         | 41.4         | 34.8            | 43.0  |                |
| Family socioeconomic status, %               |              |                 |       |                |
| Low                                          | 30.9         | 34.0            | 31.6  | 0.365          |
| Moderate                                     | 54.8         | 53.8            | 53.7  |                |
| High                                         | 14.4         | 12.3            | 14.6  |                |
| Households with ≥3 underage members, %       | 28.3         | 30.2            | 28.9  | 0.596          |

Parental educational level was defined as low (≤9 years of education), moderate (10-12 years of education) and high (>12 years of education). Family socioeconomic status was defined according to the Family Affluence Scale i.e., low (FAS=0-2), middle (FAS=3-5) and high (FAS=6-9). Students' quality of life was measured via the Pediatric Quality of Life Inventory questionnaire (PedsQL) answered by students' parents. Poor quality of life was defined as (score)≤Q1<sub>(score)</sub>. Data are presented as mean (standard deviation) for normally distributed continuous variables (age) and % of the corresponding sample for categorical variables. For the normally distributed variables (age), p-values were obtained using Student's t-test. For the categorical variables (sex, parental employment status, paternal and maternal educational status, number of underage members in household, family socioeconomic status) chi-squared test was performed. **Abbreviations:** Standard Deviation (SD); Health-related quality of life (HRQoL); 1<sup>st</sup> quartile (Q1).
